# Supplementary material for: Reaction of human telomeric unit TTAGGG and a photoactivatable Pt(iv) anticancer prodrug
Source: Royal Society of Chemistry journal article supplement (doi:10.1039/d3dt01643a), 2023-01-01
Supplement: d3dt01643a1.pdf [file d3dt01643a1.pdf]

## Reaction of human telomeric unit TTAGGG and a photoactivatable Pt(IV) anticancer prodrug

Jiafan Lin,<sup>1,2</sup> Jishuai Zhang,<sup>1,2</sup> Ziqi Ma,<sup>1</sup> Xiaoqin Wu,<sup>1</sup> Fuyi Wang,<sup>2,3</sup> Yao Zhao,<sup>2,\*</sup> Kui Wu,<sup>1,\*</sup> Yi Liu<sup>1,4\*</sup>

1. Key Laboratory of Hubei Province for Coal Conversion and New Carbon Materials; School of Chemistry and Chemical Engineering, Wuhan University of Science and Technology, Wuhan 430081, P. R. China

2. Beijing National Laboratory for Molecular Sciences; National Centre for Mass Spectrometry in Beijing; CAS Key Laboratory of Analytical Chemistry for Living Biosystems, Institute of Chemistry, Chinese Academy of Sciences, Beijing 100190, P. R. China

3. University of Chinese Academy of Sciences, Beijing 100049, P. R. China

4. School of Chemical and Environmental Engineering, Wuhan Polytechnic University, Wuhan 430023, P. R. China

### Electronic Supplementary Information

#### Contents

Table S1. MS data under positive-ion mode of the reaction between Pt(IV) complex **1** and ODN **I**.

Table S2. MS/MS fragment ions of the mono-platinated  $[\mathbf{I} + \mathbf{1}']^{2+}$

Table S3. MS/MS fragment ions of the mono-platinated  $[\mathbf{I} + \mathbf{1}'']^{2+}$

Table S4. MS/MS fragment ions of the di-platinated  $[\mathbf{I} + \mathbf{1}'_2]^{2+}$

Figure S1. The isotopic models and corresponding mass spectrum under positive-ion mode.

**Table S1.** MS data under positive-ion mode for the reaction between Pt(IV) complex **1** and ODN **I** at a molar ratio of **1** / **I** = 1.0 after irradiated under blue light for 1 h (Charges for Pt moiety and the loss of protons from **I** for balancing the charges of the ions are omitted for clarity). **1** = [Pt(N<sub>3</sub>)<sub>2</sub>(OH)<sub>2</sub>(Py)<sub>2</sub>], **1'** = [Pt(N<sub>3</sub>)(py)<sub>2</sub>]<sup>+</sup>, **1''** = [Pt(py)<sub>2</sub>]<sup>2+</sup>.

| Ions                                                                                                                           | Formula                                                                                        | <i>m/z</i> observed(calculated) |
|--------------------------------------------------------------------------------------------------------------------------------|------------------------------------------------------------------------------------------------|---------------------------------|
| [A] <sup>+</sup>                                                                                                               | C <sub>5</sub> H <sub>5</sub> N <sub>5</sub>                                                   | 136.066(136.062)                |
| [G] <sup>+</sup>                                                                                                               | C <sub>5</sub> H <sub>5</sub> N <sub>5</sub> O                                                 | 152.061(152.057)                |
| [w <sub>1</sub> ] <sup>+</sup>                                                                                                 | C <sub>10</sub> H <sub>14</sub> N <sub>5</sub> O <sub>7</sub> P                                | 348.073(348.070)                |
| [Pt(N)(py) <sub>2</sub> ] <sup>+</sup>                                                                                         | C <sub>10</sub> H <sub>9</sub> N <sub>3</sub> Pt                                               | 367.048(367.052)                |
| [Pt(N)(OH)(py) <sub>2</sub> ] <sup>+</sup>                                                                                     | C <sub>10</sub> H <sub>10</sub> N <sub>3</sub> OPt                                             | 384.058(384.055)                |
| [Pt <sup>III</sup> (OH) <sub>2</sub> (py) <sub>2</sub> ] <sup>+</sup>                                                          | C <sub>10</sub> H <sub>11</sub> N <sub>2</sub> O <sub>2</sub> Pt                               | 387.058(387.054)                |
| [Pt <sup>III</sup> (N <sub>3</sub> )(OH)(py) <sub>2</sub> ] <sup>+</sup>                                                       | C <sub>10</sub> H <sub>10</sub> N <sub>5</sub> OPt                                             | 412.065(412.061)                |
| {[Pt(N <sub>3</sub> )(OH)(py) <sub>2</sub> ] + 2H <sub>2</sub> O} <sup>+</sup>                                                 | C <sub>10</sub> H <sub>13</sub> N <sub>5</sub> O <sub>3</sub> Pt                               | 447.077(477.074)                |
| { <b>1'</b> + MeCN + Na} <sup>+</sup>                                                                                          | C <sub>12</sub> H <sub>10</sub> N <sub>6</sub> PtNa                                            | 457.056(457.059)                |
| [T] <sup>+</sup>                                                                                                               | C <sub>15</sub> H <sub>20</sub> N <sub>2</sub> O <sub>12</sub> P <sub>2</sub>                  | 483.059(483.056)                |
| [G <sub>4</sub> /G <sub>5</sub> <sup>d</sup> ] <sup>+</sup>                                                                    | C <sub>15</sub> H <sub>19</sub> N <sub>5</sub> O <sub>11</sub> P <sub>2</sub>                  | 508.064(508.063)                |
| [a <sub>2</sub> ] <sup>+</sup>                                                                                                 | C <sub>20</sub> H <sub>25</sub> N <sub>4</sub> O <sub>11</sub> P                               | 529.135(529.133)                |
| [I] <sup>3+</sup>                                                                                                              | C <sub>60</sub> H <sub>75</sub> N <sub>24</sub> O <sub>35</sub> P <sub>5</sub>                 | 616.460(616.458)                |
| [T <sub>2</sub> :G <sub>5</sub> <sup>d</sup> ] <sup>2+</sup>                                                                   | C <sub>45</sub> H <sub>56</sub> N <sub>17</sub> O <sub>29</sub> P <sub>5</sub>                 | 727.613(727.613)                |
| { <b>I</b> + <b>1''</b> } <sup>3+</sup> ( <b>4</b> )                                                                           | C <sub>70</sub> H <sub>83</sub> N <sub>26</sub> O <sub>35</sub> P <sub>5</sub> Pt              | 733.802(733.806)                |
| {[ <b>I</b> - C + H <sub>2</sub> O] + <b>1''</b> } <sup>3+</sup> (Gh) <sup>e</sup> ( <b>9</b> )                                | C <sub>69</sub> H <sub>85</sub> N <sub>26</sub> O <sub>36</sub> P <sub>5</sub> Pt              | 735.807(735.798)                |
| { <b>I</b> + [Pt(N)(py) <sub>2</sub> ]} <sup>3+</sup> ( <b>5</b> )                                                             | C <sub>70</sub> H <sub>84</sub> N <sub>27</sub> O <sub>35</sub> P <sub>5</sub> Pt              | 738.804(738.807)                |
| {[ <b>I</b> + 2O] + <b>1''</b> } <sup>3+</sup> (Sp or (8-OH-G) <sub>2</sub> ) <sup>e</sup> ( <b>10a</b> or <b>10b</b> )        | C <sub>70</sub> H <sub>83</sub> N <sub>26</sub> O <sub>37</sub> P <sub>5</sub> Pt              | 744.465(744.466)                |
| {[ <b>I</b> - C + 4H + 3O] + <b>1''</b> } <sup>3+</sup> (Gh + RedSp or DGh + 2FapyG) <sup>e</sup> ( <b>11a</b> or <b>11b</b> ) | C <sub>69</sub> H <sub>87</sub> N <sub>26</sub> O <sub>38</sub> P <sub>5</sub> Pt              | 747.144(747.142)                |
| { <b>I</b> + <b>1'</b> } <sup>3+</sup> ( <b>6</b> )                                                                            | C <sub>70</sub> H <sub>84</sub> N <sub>29</sub> O <sub>35</sub> P <sub>5</sub> Pt              | 748.141(748.142)                |
| {[ <b>I</b> + 2(H <sub>2</sub> O)] + <b>1''</b> + Na} <sup>3+</sup> (2FapyG) <sup>e</sup> ( <b>12</b> + Na)                    | C <sub>70</sub> H <sub>86</sub> N <sub>26</sub> O <sub>37</sub> P <sub>5</sub> PtNa            | 753.141(753.137)                |
| [T <sub>2</sub> :A <sub>3</sub> ] <sup>+</sup>                                                                                 | C <sub>25</sub> H <sub>32</sub> N <sub>7</sub> O <sub>17</sub> P <sub>3</sub>                  | 796.117(796.114)                |
| [ <b>I</b> - G <sup>b</sup> - H <sub>2</sub> O] <sup>2+</sup>                                                                  | C <sub>55</sub> H <sub>68</sub> N <sub>19</sub> O <sub>33</sub> P <sub>5</sub>                 | 839.651(839.653)                |
| [ <b>I</b> - G <sup>b</sup> ] <sup>2+</sup>                                                                                    | C <sub>55</sub> H <sub>70</sub> N <sub>19</sub> O <sub>34</sub> P <sub>5</sub>                 | 848.660(848.658)                |
| { <b>I</b> + <b>1'</b> + <b>1''</b> } <sup>3+</sup> ( <b>7</b> )                                                               | C <sub>80</sub> H <sub>92</sub> N <sub>31</sub> O <sub>35</sub> P <sub>5</sub> Pt <sub>2</sub> | 865.153(865.153)                |
| { <b>I</b> + <b>1'</b> <sub>2</sub> } <sup>3+</sup> ( <b>8</b> )                                                               | C <sub>80</sub> H <sub>93</sub> N <sub>34</sub> O <sub>35</sub> P <sub>5</sub> Pt <sub>2</sub> | 879.489(879.492)                |
| [I] <sup>2+</sup>                                                                                                              | C <sub>60</sub> H <sub>75</sub> N <sub>24</sub> O <sub>35</sub> P <sub>5</sub>                 | 924.182(924.183)                |
| { <b>I</b> + Na} <sup>2+</sup>                                                                                                 | C <sub>60</sub> H <sub>74</sub> N <sub>24</sub> O <sub>35</sub> P <sub>5</sub> Na              | 935.167(935.174)                |
| { <b>I</b> + K} <sup>2+</sup>                                                                                                  | C <sub>60</sub> H <sub>74</sub> N <sub>24</sub> O <sub>35</sub> P <sub>5</sub> K               | 943.157(943.161)                |
| {[ <b>I</b> - G <sup>b</sup> + H <sub>2</sub> O] + <b>1'</b> - py} <sup>2+</sup> (FapyG) <sup>e</sup> ( <b>14</b> )            | C <sub>60</sub> H <sub>76</sub> N <sub>23</sub> O <sub>35</sub> P <sub>5</sub> Pt              | 1015.663(1015.669)              |

|                                                                                          |                                            |                     |
|------------------------------------------------------------------------------------------|--------------------------------------------|---------------------|
| $[a_4 - G_4]^+$                                                                          | $C_{35}H_{44}N_9O_{21}P_3$                 | 1020.192(1020.194)  |
| $\{[I - G^b] + 1''\}^{2+} (3 - G)$                                                       | $C_{65}H_{78}N_{21}O_{34}P_5Pt$            | 1024.671(1024.676)  |
| $\{[I - G^b - H_2O] + 1'\}^{2+} (2 - G - H_2O)$                                          | $C_{65}H_{77}N_{24}O_{33}P_5Pt$            | 1037.179(1037.179)  |
| $\{[I - G^b] + 1'\}^{2+} (2 - G)$                                                        | $C_{65}H_{79}N_{24}O_{34}P_5Pt$            | 1046.182(1046.185)  |
| $\{[I - A^b] + 1'\}^{2+} (2 - A)$                                                        | $C_{65}H_{79}N_{24}O_{35}P_5Pt$            | 1054.180(1054.182)  |
| $\{[I + O] + 1' - py\}^{2+} (8-OH-G)^e$<br>(15)                                          | $C_{65}H_{79}N_{28}O_{36}P_5Pt$            | 1090.185(1090.186)  |
| $\{I + 1''\}^{2+} (3)$                                                                   | $C_{70}H_{83}N_{26}O_{35}P_5Pt$            | 1100.196(1100.201)  |
| $\{[I - C + H_2O] + 1''\}^{2+} (Gh)^e$ (16)                                              | $C_{69}H_{85}N_{26}O_{36}P_5Pt$            | 1103.201(1103.193)  |
| $\{I + [Pt(N)(py)_2]\}^{2+} (13)$                                                        | $C_{70}H_{84}N_{27}O_{35}P_5Pt$            | 1107.695(1107.706)  |
| $\{I + 1'' + Na\}^{2+} (3 + Na)$                                                         | $C_{70}H_{82}N_{26}O_{35}P_5PtNa$          | 1111.188(1111.192)  |
| $\{[I + 2O] + 1''\}^{2+} ((8-OH-G)_2 \text{ or Sp})^e$ (17a or 17b)                      | $C_{70}H_{83}N_{26}O_{37}P_5Pt$            | 1116.191(1116.196)  |
| $\{[I - C + 4H + 3O] + 1''\}^{2+} (Gh + RedSp \text{ or DGh} + 2FapyG)^e$ (18)           | $C_{69}H_{87}N_{26}O_{38}P_5Pt$            | 1120.204(1120.209)  |
| $\{I + 1'\}^{2+} (2)$                                                                    | $C_{70}H_{84}N_{29}O_{35}P_5Pt$            | 1121.706(1121.709)  |
| $\{[I + 2(H_2O)] + 1'' + Na\}^{3+}$<br>(2FapyG) <sup>e</sup> (19 + Na)                   | $C_{70}H_{86}N_{26}O_{37}P_5PtNa$          | 1129.202(1129.202)  |
| $\{I + 1'' + Na\}^{2+} (2 + Na)$                                                         | $C_{70}H_{83}N_{29}O_{35}P_5PtNa$          | 1132.694(1132.700)  |
| $\{[I - C + 2H + 3O] + 1'' + K\}^{2+}$<br>(Gh + Sp or DGh + RedSp) <sup>e</sup> (20 + K) | $C_{69}H_{84}N_{26}O_{38}P_5PtK$           | 1138.202(1138.179)  |
| $\{[I + O] + 1' + Na\}^{2+} (8-OH-G)^e$<br>(21 + Na)                                     | $C_{70}H_{83}N_{29}O_{36}P_5PtNa$          | 1140.684(1140.698)  |
| $\{[I - C + O] + 1' + K\}^{2+} (DGh)^e$ (22 + K)                                         | $C_{65}H_{83}N_{29}O_{36}P_5PtK$           | 1142.698(1142.685)  |
| $\{[I + 2(H_2O)] + 1' + Na\}^{2+}$<br>(2FapyG) <sup>e</sup> (23 + Na)                    | $C_{70}H_{87}N_{29}O_{37}P_5PtNa$          | 1150.729(1150.711)  |
| $\{[I]_2 - G^b\}^{3+}$                                                                   | $C_{115}H_{145}N_{43}O_{69}P_{10}$         | 1181.889(1181.893)  |
| $\{[I]_2 - A^b\}^{3+}$                                                                   | $C_{115}H_{145}N_{43}O_{70}P_{10}$         | 1187.218(1187.224)  |
| $[I]_2^{3+}$                                                                             | $C_{120}H_{150}N_{48}O_{70}P_{10}$         | 1232.237(1232.243)  |
| $\{[I]_2 + Na\}^{3+}$                                                                    | $C_{120}H_{149}N_{48}O_{70}P_{10}Na$       | 1239.559(1239.570)  |
| $\{[I]_2 + K\}^{3+}$                                                                     | $C_{120}H_{149}N_{48}O_{70}P_{10}K$        | 1244.887(1244.894)  |
| $\{I + 1' + 1''\}^{2+} (24)$                                                             | $C_{80}H_{92}N_{31}O_{35}P_5Pt_2$          | 1297.216(1297.226)  |
| $\{I + 1'_2\}^{2+} (25)$                                                                 | $C_{80}H_{93}N_{34}O_{35}P_5Pt_2$          | 1318.727(1318.734)  |
| $\{[I + 2H + 5O] + 1' + 1''\}^{2+}$                                                      | $C_{80}H_{94}N_{31}O_{40}P_5Pt_2$          | 1338.218(1338.221)  |
| $\{[I - C + 2H + 3O] + 1' + 1'' + 2Na\}^{2+}$                                            | $C_{79}H_{92}N_{31}O_{38}P_5Pt_2Na_2$      | 1338.218(1338.208)  |
| $\{[I]_2 + 1'\}^{3+} (26)$                                                               | $C_{130}H_{159}N_{53}O_{70}P_{10}Pt$       | 1363.586(1363.593)  |
| $[I]_3^{4+}$                                                                             | $C_{180}H_{225}N_{72}O_{105}P_{15}$        | 1386.262 (1386.272) |
| $\{[I]_3 + 1''\}^{4+} (27)$                                                              | $C_{190}H_{233}N_{74}O_{105}P_{15}Pt$      | 1474.015(1474.031)  |
| $\{[I]_3 + 1'\}^{4+} (28)$                                                               | $C_{190}H_{234}N_{77}O_{105}P_{15}Pt$      | 1484.768(1484.785)  |
| $\{[I]_2 + 1' + 1'' + K + 2Na\}^{3+}$                                                    | $C_{140}H_{164}N_{55}O_{70}P_{10}Pt_2Na_2$ | 1508.251(1508.244)  |

|                                                                                                                           |                                                                                                                         |                    |
|---------------------------------------------------------------------------------------------------------------------------|-------------------------------------------------------------------------------------------------------------------------|--------------------|
|                                                                                                                           | K                                                                                                                       |                    |
| $\{[\mathbf{I}]_2 - \text{C} + \text{H}_2\text{O} + \mathbf{1}' + \mathbf{1}'' + 2\mathbf{K}\}^{3+}$<br>(Gh) <sup>e</sup> | C <sub>139</sub> H <sub>167</sub> N <sub>55</sub> O <sub>71</sub> P <sub>10</sub> Pt <sub>2</sub> K <sub>2</sub>        | 1508.251(1508.245) |
| $\{[\mathbf{I}]_3 + \text{O} + \mathbf{1}' + \mathbf{1}'' + 3\text{Na}\}^{3+}$ (8-OH-G) <sup>e</sup>                      | C <sub>140</sub> H <sub>164</sub> N <sub>55</sub> O <sub>71</sub> P <sub>10</sub> Pt <sub>2</sub> Na <sub>3</sub>       | 1508.251(1508.251) |
| $\{[\mathbf{a}_6 - \text{G}_6^{\text{c}}] - \text{G}^{\text{b}}\}^+$                                                      | C <sub>50</sub> H <sub>63</sub> N <sub>14</sub> O <sub>32</sub> P <sub>5</sub>                                          | 1527.241(1527.249) |
| $\{[\mathbf{I}]_3 + \mathbf{1}' + \mathbf{1}''\}^{4+}$ (29)                                                               | C <sub>200</sub> H <sub>242</sub> N <sub>79</sub> O <sub>105</sub> P <sub>15</sub> Pt <sub>2</sub>                      | 1572.775(1572.794) |
| $\{[\mathbf{I}]_3 + \mathbf{1}'_2\}^{4+}$ (30)                                                                            | C <sub>200</sub> H <sub>243</sub> N <sub>82</sub> O <sub>105</sub> P <sub>15</sub> Pt <sub>2</sub>                      | 1583.531(1583.548) |
| $\{[\mathbf{I}]_3 + \mathbf{1}' + \mathbf{1}'' + \text{K} + 2\text{Na}\}^{4+}$                                            | C <sub>200</sub> H <sub>239</sub> N <sub>79</sub> O <sub>105</sub> P <sub>15</sub> Pt <sub>2</sub> Na <sub>2</sub><br>K | 1593.269(1593.273) |
| $\{[\mathbf{I}]_3 - \text{C} + \text{H}_2\text{O} + \mathbf{1}' + \mathbf{1}'' + 2\mathbf{K}\}^{4+}$<br>(Gh) <sup>e</sup> | C <sub>199</sub> H <sub>242</sub> N <sub>79</sub> O <sub>106</sub> P <sub>15</sub> Pt <sub>2</sub> K <sub>2</sub>       | 1593.269(1593.274) |
| $\{[\mathbf{I}]_3 + \text{O} + \mathbf{1}' + \mathbf{1}'' + 3\text{Na}\}^{4+}$ (8-OH-G) <sup>e</sup>                      | C <sub>200</sub> H <sub>239</sub> N <sub>79</sub> O <sub>106</sub> P <sub>15</sub> Pt <sub>2</sub> Na <sub>3</sub>      | 1593.269(1593.279) |
| [d <sub>5</sub> ] <sup>+</sup>                                                                                            | C <sub>50</sub> H <sub>64</sub> N <sub>19</sub> O <sub>32</sub> P <sub>5</sub>                                          | 1598.260(1598.273) |
| [a <sub>6</sub> - G <sub>6</sub> <sup>c</sup> ] <sup>+</sup>                                                              | C <sub>55</sub> H <sub>68</sub> N <sub>19</sub> O <sub>33</sub> P <sub>5</sub>                                          | 1678.284(1678.299) |
| $\{[\mathbf{I}]_2 - \text{G}^{\text{b}} - \text{H}_2\text{O}\}^{2+}$                                                      | C <sub>115</sub> H <sub>143</sub> N <sub>43</sub> O <sub>68</sub> P <sub>10</sub>                                       | 1763.315(1763.330) |
| $\{[\mathbf{I}]_2 - \text{G}^{\text{b}}\}^{2+}$                                                                           | C <sub>115</sub> H <sub>145</sub> N <sub>43</sub> O <sub>69</sub> P <sub>10</sub>                                       | 1772.314(1772.335) |
| $\{[\mathbf{I}]_2 - \text{A}^{\text{b}}\}^{2+}$                                                                           | C <sub>115</sub> H <sub>145</sub> N <sub>43</sub> O <sub>70</sub> P <sub>10</sub>                                       | 1780.316(1780.333) |
| $\{[\mathbf{I}]_3 - \text{G}^{\text{b}}\}^{3+}$                                                                           | C <sub>175</sub> H <sub>220</sub> N <sub>67</sub> O <sub>104</sub> P <sub>15</sub>                                      | 1797.659(1797.677) |
| $\{[\mathbf{I}]_3 - \text{A}^{\text{b}}\}^{3+}$                                                                           | C <sub>175</sub> H <sub>220</sub> N <sub>67</sub> O <sub>105</sub> P <sub>15</sub>                                      | 1802.994(1803.009) |
| [I] <sup>+</sup>                                                                                                          | C <sub>60</sub> H <sub>75</sub> N <sub>24</sub> O <sub>35</sub> P <sub>5</sub>                                          | 1847.347(1847.356) |
| $\{[\mathbf{I}]_2 + 2(\text{MeCN}) + \text{Na} + \text{K}\}^{2+}$                                                         | C <sub>122</sub> H <sub>151</sub> N <sub>49</sub> O <sub>70</sub> P <sub>10</sub> NaK                                   | 1898.401(1898.342) |
| $\{[\mathbf{I}]_4 + \mathbf{1}'\}^{4+}$ (31)                                                                              | C <sub>250</sub> H <sub>309</sub> N <sub>101</sub> O <sub>140</sub> P <sub>20</sub> Pt                                  | 1946.606(1946.623) |
| $\{[\mathbf{I}]_3 + \mathbf{1}''\}^{3+}$ (32)                                                                             | C <sub>190</sub> H <sub>233</sub> N <sub>74</sub> O <sub>105</sub> P <sub>15</sub> Pt                                   | 1965.021(1965.038) |
| $\{[\mathbf{I}]_3 + \mathbf{1}'\}^{3+}$ (33)                                                                              | C <sub>190</sub> H <sub>234</sub> N <sub>77</sub> O <sub>105</sub> P <sub>15</sub> Pt                                   | 1979.356(1979.377) |

<sup>a</sup>The most abundant isotopic mass-to-charge ratio.

<sup>b</sup>A and G represent the neutral loss of an adenine and a guanine base, respectively.

<sup>c</sup>T<sub>n</sub>, A<sub>n</sub> and G<sub>n</sub> represent the loss of a thymine, an adenine and a guanine base, respectively, followed by elimination of a H<sub>2</sub>O molecule to form a furan ring, n indicates the position of the base in strand I.

<sup>d</sup>The internal fragment B<sub>m</sub>:B<sub>n</sub> results from fragmentation at both the a- and w-sites, having a phosphate group at their 5'-terminus and a furan ring at the 3'-terminus.

<sup>e</sup>The most likely oxidation adduct is indicated in brackets.

**Table S2.** Fragment ions observed by MS/MS analysis in positive-ion mode of mono-platinated **I** ( $[\mathbf{I} + \mathbf{1}']^{2+}$ ,  $m/z$  1121.706) produced by the reaction of complex **1** with ODN **I** at 310 K after irradiation under blue light for 1 h. (Charges for Pt moiety and the loss of protons from **I** for balancing the charges of the ions are omitted for clarity).  $\mathbf{1}' = [\text{Pt}(\text{N}_3)(\text{py})_2]^+$ .

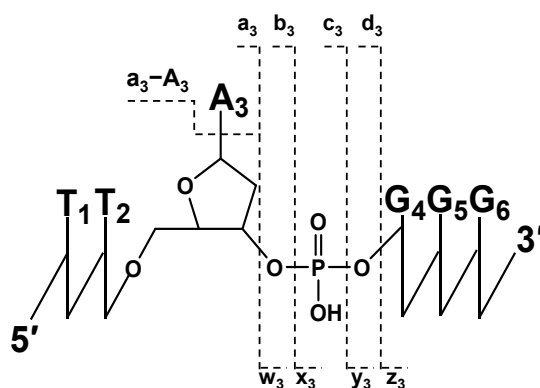

| Fragments                                                                 | Formula(neutral)                                                           | $m/z^a$<br>observed(calculated) |
|---------------------------------------------------------------------------|----------------------------------------------------------------------------|---------------------------------|
| $[\text{w}_1]^+$                                                          | $\text{C}_{10}\text{H}_{14}\text{N}_5\text{O}_7\text{P}$                   | 348.080(348.070)                |
| $\{\text{w}_1 + \mathbf{1}'\}^+$                                          | $\text{C}_{20}\text{H}_{23}\text{N}_{10}\text{O}_7\text{PPt}$              | 742.133(742.117)                |
| $[\text{y}_2 - \text{G}_6^c]^+$                                           | $\text{C}_{15}\text{H}_{18}\text{N}_5\text{O}_8\text{P}$                   | 428.048(428.094)                |
| $[\text{w}_2]^+$                                                          | $\text{C}_{20}\text{H}_{26}\text{N}_{10}\text{O}_{13}\text{P}_2$           | 677.137(677.125)                |
| $\{\text{w}_2 + \mathbf{1}'\}^+$                                          | $\text{C}_{30}\text{H}_{35}\text{N}_{15}\text{O}_{13}\text{P}_2\text{Pt}$  | 1071.182(1071.172)              |
| $\{\text{w}_3 + \mathbf{1}' - \text{N}_3\}^{2+}$                          | $\text{C}_{40}\text{H}_{46}\text{N}_{17}\text{O}_{19}\text{P}_3\text{Pt}$  | 679.121(679.109)                |
| $\{\text{w}_3 + \mathbf{1}'\}^{2+}$                                       | $\text{C}_{40}\text{H}_{47}\text{N}_{20}\text{O}_{19}\text{P}_3\text{Pt}$  | 700.627(700.617)                |
| $\{\text{w}_3 + \mathbf{1}'\}^+$                                          | $\text{C}_{40}\text{H}_{47}\text{N}_{20}\text{O}_{19}\text{P}_3\text{Pt}$  | 1400.251(1400.226)              |
| $\{\text{x}_5 + \mathbf{1}' - \text{py}\}^{2+}$                           | $\text{C}_{55}\text{H}_{67}\text{N}_{26}\text{O}_{30}\text{P}_5\text{Pt}$  | 962.162(962.151)                |
| $\{\text{w}_5 + \mathbf{1}'\}^{2+}$                                       | $\text{C}_{60}\text{H}_{72}\text{N}_{27}\text{O}_{31}\text{P}_5\text{Pt}$  | 1009.670(1009.669)              |
| $\{\text{z}_5 + \mathbf{1}' - \text{N}_3 + \text{MeCN} + \text{K}\}^{2+}$ | $\text{C}_{62}\text{H}_{70}\text{N}_{25}\text{O}_{27}\text{P}_4\text{PtK}$ | 978.661(978.664)                |
| $\{[\text{a}_2 - \text{T}_2^c] - \text{H}_2\text{O}\}^+$                  | $\text{C}_{15}\text{H}_{17}\text{N}_2\text{O}_8\text{P}$                   | 385.090(385.078)                |
| $[\text{a}_2]^+$                                                          | $\text{C}_{20}\text{H}_{25}\text{N}_4\text{O}_{11}\text{P}$                | 529.141(529.133)                |
| $[\text{a}_3 - \text{A}_3^c]^+$                                           | $\text{C}_{25}\text{H}_{32}\text{N}_4\text{O}_{16}\text{P}_2$              | 707.148(707.133)                |
| $\{[\text{a}_3 - \text{A}_3^c] + \text{Na}\}^+$                           | $\text{C}_{25}\text{H}_{31}\text{N}_4\text{O}_{16}\text{P}_2\text{Na}$     | 729.134(729.117)                |
| $\{\text{b}_3 + \mathbf{1}' - \text{N}_3 + \text{K}\}^+$                  | $\text{C}_{40}\text{H}_{46}\text{N}_{11}\text{O}_{17}\text{P}_2\text{PtK}$ | 1249.188(1249.191)              |
| $[\text{a}_4 - \text{G}_4^c]^+$                                           | $\text{C}_{35}\text{H}_{44}\text{N}_6\text{O}_{21}\text{P}_3$              | 1020.202(1020.194)              |
| $\{[\text{a}_4 - \text{G}_4^c] + \mathbf{1}'\}^+$                         | $\text{C}_{45}\text{H}_{53}\text{N}_{14}\text{O}_{21}\text{P}_3\text{Pt}$  | 1414.257(1414.245)              |
| $\{\text{a}_4 + \mathbf{1}' - 2\text{py}\}^{2+}$                          | $\text{C}_{40}\text{H}_{48}\text{N}_{17}\text{O}_{22}\text{P}_3\text{Pt}$  | 704.123(704.109)                |
| $\{\text{d}_4 + \mathbf{1}' - \text{N}_3\}^+$                             | $\text{C}_{50}\text{H}_{60}\text{N}_{16}\text{O}_{26}\text{P}_4\text{Pt}$  | 1621.267(1621.255)              |
| $\{\text{d}_4 + \mathbf{1}'\}^+$                                          | $\text{C}_{50}\text{H}_{61}\text{N}_{19}\text{O}_{26}\text{P}_4\text{Pt}$  | 1663.284(1663.272)              |

|                                           |                                 |                    |
|-------------------------------------------|---------------------------------|--------------------|
| $\{d_5 + 1' - N_3\}^{2+}$                 | $C_{60}H_{72}N_{21}O_{32}P_5Pt$ | 975.665(975.658)   |
| $\{[a_5 - G_5] - G^b\}$                   | $C_{40}H_{51}N_9O_{26}P_4$      | 1198.200(1198.197) |
| $[a_5 - G_5^c]^+$                         | $C_{45}H_{56}N_{14}O_{27}P_4$   | 1349.260(1349.246) |
| $\{[a_5 - G_5^c] + 1' - N_3\}^+$          | $C_{55}H_{64}N_{16}O_{27}P_4Pt$ | 1701.285(1701.282) |
| $\{[a_5 - G_5^c] + 1'\}^+$                | $C_{55}H_{65}N_{19}O_{27}P_4Pt$ | 1744.282(1744.297) |
| $\{[a_6 - G_6^c] + 1' - N_3\}^{2+}$       | $C_{65}H_{76}N_{21}O_{33}P_5Pt$ | 1015.673(1015.671) |
| $\{[a_6 - G_6^c] + 1' - py + MeCN\}^{2+}$ | $C_{62}H_{75}N_{24}O_{33}P_5Pt$ | 1018.181(1018.171) |
| $\{[a_6 - G_6^c] + 1'\}^{2+}$             | $C_{65}H_{77}N_{24}O_{33}P_5Pt$ | 1037.182(1037.180) |

#### Other fragment ions

|                                 |                                 |                    |
|---------------------------------|---------------------------------|--------------------|
| $[A]^+$                         | $C_5H_5N_5$                     | 136.067(136.062)   |
| $[G]^+$                         | $C_5H_5N_5O$                    | 152.065(152.057)   |
| $[T_2^d]^+$                     | $C_{15}H_{20}N_2O_{12}P_2$      | 483.068(483.055)   |
| $[A_3^d]^+$                     | $C_{15}H_{19}N_5O_{10}P_2$      | 492.076(492.070)   |
| $[G_4/G_5^d]^+$                 | $C_{15}H_{19}N_5O_{11}P_2$      | 508.074(508.063)   |
| $\{G + 1' - N_3 + MeCN\}^+$     | $C_{17}H_{16}N_8OPt$            | 544.123(544.117)   |
| $\{G + 1'\}^+$                  | $C_{15}H_{14}N_{10}OPt$         | 546.122(546.109)   |
| $[T_2:A_3^d]^+$                 | $C_{25}H_{32}N_7O_{17}P_3$      | 796.125(796.117)   |
| $\{[G_4/G_5^d] + 1'\}^+$        | $C_{25}H_{28}N_{10}O_{11}P_2Pt$ | 902.128(902.114)   |
| $\{[I - G^b] + 1' - N_3\}^{2+}$ | $C_{65}H_{78}N_{21}O_{34}P_5Pt$ | 1024.681(1024.676) |
| $\{[I - G^b] + 1'\}^{2+}$       | $C_{65}H_{79}N_{24}O_{34}P_5Pt$ | 1046.186(1046.185) |
| $\{[I - A^b] + 1'\}^{2+}$       | $C_{65}H_{79}N_{24}O_{35}P_5Pt$ | 1054.190(1054.180) |
| $\{I + 1'\}^{2+}$               | $C_{70}H_{84}N_{29}O_{35}P_5Pt$ | 1121.710(1121.709) |
| $[T_2:G_4^d]^+$                 | $C_{35}H_{44}N_{12}O_{23}P_4$   | 1125.177(1125.167) |
| $\{[G_4:G_5^d] + 1'\}^+$        | $C_{35}H_{40}N_{15}O_{17}P_3Pt$ | 1231.178(1231.166) |
| $[I + 1' - N_3]^{2+}$           | $C_{70}H_{83}N_{26}O_{35}P_5Pt$ | 1100.207(1100.201) |
| $\{I + 1' - py + MeCN\}^{2+}$   | $C_{67}H_{82}N_{29}O_{35}P_5Pt$ | 1102.708(1102.701) |

<sup>a</sup>The most abundant isotopic mass-to-charge ratio.

<sup>b</sup>A and G represent the neutral loss of an adenine and a guanine base, respectively.

<sup>c</sup>T<sub>n</sub>, A<sub>n</sub> and G<sub>n</sub> represent the loss of a thymine, an adenine and a guanine base, respectively, followed by elimination of a H<sub>2</sub>O molecule to form a furan ring, n indicates the position of the base in strand I.

<sup>d</sup>The internal fragment B<sub>m</sub>:B<sub>n</sub> results from fragmentation at both the a- and w-sites, having a phosphate group at their 5'-terminus and a furan ring at the 3'-terminus.

**Table S3.** Fragment ions observed by MS/MS analysis in positive-ion mode of mono-platinated **I** ( $[\mathbf{I} + \mathbf{1}'']^{2+}$ ,  $m/z$  1100.196) produced by the reaction of complex **1** with ODN **I** at 310 K after irradiation under blue light for 1 h. (Charges for Pt moiety and the loss of protons from **I** for balancing the charges of the ions are omitted for clarity).  $\mathbf{1}'' = [\text{Pt}(\text{py})_2]^{2+}$ .



| Fragments                                                | Formula(neutral)                                                            | $m/z^a$              |
|----------------------------------------------------------|-----------------------------------------------------------------------------|----------------------|
|                                                          |                                                                             | observed(calculated) |
| $[\text{w}_1]^+$                                         | $\text{C}_{10}\text{H}_{14}\text{N}_5\text{O}_7\text{P}$                    | 348.075(348.070)     |
| $\{\text{w}_1 + \text{G} + \mathbf{1}''\}^+$             | $\text{C}_{25}\text{H}_{27}\text{N}_{12}\text{O}_8\text{P}_2\text{Pt}$      | 850.148(850.156)     |
| $\{[\text{w}_2 - \text{G}^b] + \mathbf{1}''\}^+$         | $\text{C}_{25}\text{H}_{29}\text{N}_7\text{O}_{12}\text{P}_2\text{Pt}$      | 877.114(877.109)     |
| $\{\text{w}_2 + \text{G} + \mathbf{1}''\}^+$             | $\text{C}_{35}\text{H}_{39}\text{N}_{17}\text{O}_{14}\text{P}_2\text{Pt}$   | 1179.202(1179.206)   |
| $\{[\text{w}_3 - \text{G}^b] + \mathbf{1}''\}^{2+}$      | $\text{C}_{35}\text{H}_{41}\text{N}_{12}\text{O}_{18}\text{P}_3\text{Pt}$   | 603.589(603.586)     |
| $\{[\text{w}_3 - \text{G}^b] + \mathbf{1}''\}^+$         | $\text{C}_{35}\text{H}_{41}\text{N}_{12}\text{O}_{18}\text{P}_3\text{Pt}$   | 1206.158(1206.156)   |
| $\{[\text{x}_4 + \mathbf{1}'' + \text{Na}]^{2+}$         | $\text{C}_{50}\text{H}_{57}\text{N}_{22}\text{O}_{23}\text{P}_4\text{PtNa}$ | 838.648(838.631)     |
| $\{\text{z}_4 - \text{G}^b + \mathbf{1}''\}^{2+}$        | $\text{C}_{45}\text{H}_{50}\text{N}_{17}\text{O}_{19}\text{P}_3\text{Pt}$   | 711.133(711.124)     |
| $\{[\text{w}_5 - \text{G}^b] + \mathbf{1}''\}^{2+}$      | $\text{C}_{55}\text{H}_{66}\text{N}_{19}\text{O}_{30}\text{P}_5\text{Pt}$   | 912.636(912.633)     |
| $\{\text{w}_5 + \text{G} + \mathbf{1}''\}^{2+}$          | $\text{C}_{65}\text{H}_{76}\text{N}_{29}\text{O}_{32}\text{P}_5\text{Pt}$   | 1063.685(1063.686)   |
| $\{[\text{a}_2 - \text{T}_2^c] - \text{H}_2\text{O}\}^+$ | $\text{C}_{15}\text{H}_{17}\text{N}_2\text{O}_8\text{P}$                    | 385.088(385.078)     |
| $[\text{a}_2]^+$                                         | $\text{C}_{20}\text{H}_{25}\text{N}_4\text{O}_{11}\text{P}$                 | 529.143(529.133)     |
| $[\text{d}_2]^+$                                         | $\text{C}_{20}\text{H}_{28}\text{N}_4\text{O}_{15}\text{P}_2$               | 627.116(627.109)     |
| $[\text{a}_3]^+$                                         | $\text{C}_{30}\text{H}_{37}\text{N}_9\text{O}_{16}\text{P}_2$               | 842.191(842.188)     |
| $[\text{a}_4 - \text{G}_4^c]^+$                          | $\text{C}_{35}\text{H}_{44}\text{N}_9\text{O}_{21}\text{P}_3$               | 1020.196(1020.195)   |
| $\{\text{a}_4 + [\mathbf{1}'' - \text{py}]\}^{2+}$       | $\text{C}_{45}\text{H}_{52}\text{N}_{15}\text{O}_{22}\text{P}_3\text{Pt}$   | 722.131(722.121)     |
| $\{\text{a}_5 - \text{G}_5^c\}^+$                        | $\text{C}_{45}\text{H}_{56}\text{N}_{14}\text{O}_{27}\text{P}_4$            | 1349.245(1349.250)   |
| $\{\text{a}_5 + \mathbf{1}''\}^{2+}$                     | $\text{C}_{60}\text{H}_{69}\text{N}_{21}\text{O}_{28}\text{P}_4\text{Pt}$   | 926.672(926.672)     |
| $\{[\text{a}_5 - \text{G}_5^c] + \mathbf{1}''\}^+$       | $\text{C}_{55}\text{H}_{64}\text{N}_{16}\text{O}_{27}\text{P}_4\text{Pt}$   | 1701.267(1701.281)   |
| $\{[\text{a}_5 - \text{G}^b] + \mathbf{1}''\}^{2+}$      | $\text{C}_{55}\text{H}_{66}\text{N}_{16}\text{O}_{28}\text{P}_4\text{Pt}$   | 860.154(860.150)     |
| $\{[\text{a}_5 - \text{G}^b] + \mathbf{1}''\}^+$         | $\text{C}_{55}\text{H}_{66}\text{N}_{16}\text{O}_{28}\text{P}_4\text{Pt}$   | 1719.288(1719.292)   |



|                                     |                                 |                    |
|-------------------------------------|---------------------------------|--------------------|
| $\{[b_5 - G^b] + [1'' - py]\}^{2+}$ | $C_{50}H_{61}N_{15}O_{28}P_4Pt$ | 820.133(82.128)    |
| $\{[b_5 - G^b] + [1'' - py]\}^+$    | $C_{50}H_{61}N_{15}O_{28}P_4Pt$ | 1639.250(1639.248) |
| $\{[d_5 - G^b] + 1''\}^{2+}$        | $C_{55}H_{67}N_{16}O_{31}P_5Pt$ | 900.146(900.133)   |
| $\{[d_5 - G^b] + 1''\}^+$           | $C_{55}H_{67}N_{16}O_{31}P_5Pt$ | 1799.256(1799.258) |
| $\{c_5 + A + 1''\}^{2+}$            | $C_{65}H_{77}N_{26}O_{31}P_5Pt$ | 1035.182(1035.187) |
| $\{d_5 + 1'' + MeCN\}^{2+}$         | $C_{62}H_{75}N_{22}O_{32}P_5Pt$ | 996.164(996.171)   |
| $\{[a_6 - G_6^c] + 1''\}^{2+}$      | $C_{65}H_{76}N_{21}O_{33}P_5Pt$ | 1015.671(1015.671) |

**Other fragment ions**

|                                   |                                 |                    |
|-----------------------------------|---------------------------------|--------------------|
| $[A]^+$                           | $C_5H_5N_5$                     | 136.067(136.062)   |
| $[G]^+$                           | $C_5H_5N_5O$                    | 152.062(152.057)   |
| $[T_2^d]^+$                       | $C_{15}H_{20}N_2O_{12}P_2$      | 483.065(483.055)   |
| $[A_3^d]^+$                       | $C_{15}H_{19}N_5O_{10}P_2$      | 492.074(492.070)   |
| $\{G + G + 1''\}^+$               | $C_{20}H_{18}N_{12}O_2Pt$       | 654.143(654.141)   |
| $[T_2:A_3^d]^+$                   | $C_{25}H_{32}N_7O_{17}P_3$      | 796.121(796.117)   |
| $\{[T_2:G_5^d] + G + 1''\}^{2+}$  | $C_{60}H_{69}N_{24}O_{30}P_5Pt$ | 979.152(979.156)   |
| $\{[G_4:G_5^d] - H_2O + 1''\}^+$  | $C_{45}H_{51}N_{17}O_{21}P_4Pt$ | 1485.199(1485.213) |
| $\{[G_4/G_5^d] + G + 1''\}^+$     | $C_{30}H_{32}N_{12}O_{12}P_2Pt$ | 1010.150(1010.146) |
| $\{[I - G^b] + [1'' - py]\}^{2+}$ | $C_{60}H_{73}N_{20}O_{34}P_5Pt$ | 985.157(985.156)   |
| $\{[I - G^b] + 1''\}^{2+}$        | $C_{65}H_{78}N_{21}O_{34}P_5Pt$ | 1024.676(1024.680) |
| $\{I + 1'' - py\}^{2+}$           | $C_{65}H_{78}N_{25}O_{35}P_5Pt$ | 1060.672(1060.672) |

<sup>a</sup>The most abundant isotopic mass-to-charge ratio.

<sup>b</sup>A and G represent the neutral loss of an adenine and a guanine base, respectively.

<sup>c</sup>T<sub>n</sub>, A<sub>n</sub> and G<sub>n</sub> represent the loss of a thymine, an adenine and a guanine base, respectively, followed by elimination of a H<sub>2</sub>O molecule to form a furan ring, n indicates the position of the base in strand I.

<sup>d</sup>The internal fragment B<sub>m</sub>:B<sub>n</sub> results from fragmentation at both the a- and w-sites, having a phosphate group at their 5'-terminus and a furan ring at the 3'-terminus.

**Table S4.** Fragment ions observed by MS/MS analysis in positive-ion mode of mono-platinated **I** ( $[\mathbf{I} + \mathbf{1}'_2]^{2+}$ ,  $m/z$  1318.727) produced by the reaction of complex **1** with ODN **I** at 310 K after irradiation under blue light for 1 h. (Charges for Pt moiety and the loss of protons from **I** for balancing the charges of the ions are omitted for clarity).  $\mathbf{1}' = [\text{Pt}(\text{N}_3)(\text{py})_2]^+$ .

| Fragments                                                                  | Formula(neutral)                                                            | $m/z^a$              |
|----------------------------------------------------------------------------|-----------------------------------------------------------------------------|----------------------|
|                                                                            |                                                                             | observed(calculated) |
| $[\mathbf{w}_1]^+$                                                         | $\text{C}_{10}\text{H}_{14}\text{N}_5\text{O}_7\text{P}$                    | 348.084(348.070)     |
| $\{\mathbf{w}_1 + \mathbf{1}'\}^+$                                         | $\text{C}_{20}\text{H}_{23}\text{N}_{10}\text{O}_7\text{PPt}$               | 742.133(742.121)     |
| $[\mathbf{w}_2 - \text{G}^b]^+$                                            | $\text{C}_{15}\text{H}_{21}\text{N}_5\text{O}_{12}\text{P}_2$               | 526.082(526.070)     |
| $[\mathbf{w}_2]^+$                                                         | $\text{C}_{20}\text{H}_{26}\text{N}_{10}\text{O}_{13}\text{P}_2$            | 677.131(677.125)     |
| $\{\mathbf{w}_2 + \mathbf{1}'\}^{2+}$                                      | $\text{C}_{30}\text{H}_{35}\text{N}_{15}\text{O}_{13}\text{P}_2\text{Pt}$   | 1071.181(1071.174)   |
| $\{\mathbf{w}_3 + \mathbf{1}'_2\}^{2+}$                                    | $\text{C}_{50}\text{H}_{56}\text{N}_{25}\text{O}_{19}\text{P}_3\text{Pt}_2$ | 897.654(897.642)     |
| $\{\mathbf{w}_4 + \mathbf{1}'_2\}^{2+}$                                    | $\text{C}_{60}\text{H}_{68}\text{N}_{30}\text{O}_{24}\text{P}_4\text{Pt}_2$ | 1054.176(1054.171)   |
| $\{[\mathbf{z}_4 - \text{H}_2\text{O}] + \mathbf{1}' - \text{py}\}^{2+}$   | $\text{C}_{45}\text{H}_{49}\text{N}_{24}\text{O}_{19}\text{P}_3\text{Pt}$   | 759.626(759.631)     |
| $[\mathbf{a}_2]^+$                                                         | $\text{C}_{20}\text{H}_{25}\text{N}_4\text{O}_{11}\text{P}$                 | 529.136(529.133)     |
| $[\mathbf{a}_4 - \text{G}_4^c]^+$                                          | $\text{C}_{35}\text{H}_{44}\text{N}_9\text{O}_{21}\text{P}_3$               | 1020.201(1020.195)   |
| $[\mathbf{a}_5 - \text{G}_5^c]^+$                                          | $\text{C}_{45}\text{H}_{56}\text{N}_{14}\text{O}_{27}\text{P}_4$            | 1349.266(1349.250)   |
| $\{[\mathbf{a}_5 - \text{G}_5^c] + \mathbf{1}'\}^+$                        | $\text{C}_{55}\text{H}_{65}\text{N}_{19}\text{O}_{27}\text{P}_4\text{Pt}$   | 1744.290(1744.299)   |
| <b>Other fragment ions</b>                                                 |                                                                             |                      |
| $[\mathbf{T}_2^d]^+$                                                       | $\text{C}_{15}\text{H}_{20}\text{N}_2\text{O}_{12}\text{P}_2$               | 483.068(483.055)     |
| $[\mathbf{G}_4/\mathbf{G}_5^d]^+$                                          | $\text{C}_{15}\text{H}_{19}\text{N}_5\text{O}_{11}\text{P}_2$               | 508.074(508.063)     |
| $\{\mathbf{G} + \mathbf{1}'\}^+$                                           | $\text{C}_{15}\text{H}_{14}\text{N}_{10}\text{OPt}$                         | 546.117(546.109)     |
| $[\mathbf{T}_2:\mathbf{A}_3^d]^+$                                          | $\text{C}_{25}\text{H}_{32}\text{N}_7\text{O}_{17}\text{P}_3$               | 796.125(796.117)     |
| $[\mathbf{G}_4:\mathbf{G}_5^d]^+$                                          | $\text{C}_{25}\text{H}_{32}\text{N}_{10}\text{O}_{17}\text{P}_3$            | 837.126(837.115)     |
| $[\mathbf{I}]^{2+}$                                                        | $\text{C}_{60}\text{H}_{75}\text{N}_{24}\text{O}_{35}\text{P}_5$            | 924.191(924.180)     |
| $\{\mathbf{I} + \mathbf{1}'\}^{2+}$                                        | $\text{C}_{70}\text{H}_{84}\text{N}_{29}\text{O}_{35}\text{P}_5\text{Pt}$   | 1121.710(1121.711)   |
| $[\mathbf{T}_2:\mathbf{G}_4^d]^+$                                          | $\text{C}_{35}\text{H}_{44}\text{N}_{12}\text{O}_{23}\text{P}_4$            | 1125.163(1125.164)   |
| $\{\mathbf{I} + \mathbf{1}'_2 - 2\text{N}_3 - \text{py} + \text{N}\}^{2+}$ | $\text{C}_{75}\text{H}_{87}\text{N}_{28}\text{O}_{35}\text{P}_5\text{Pt}_2$ | 1243.706(1243.702)   |
| $\{[\mathbf{I} - \text{A}^b] + \mathbf{1}'_2\}^{2+}$                       | $\text{C}_{75}\text{H}_{88}\text{N}_{29}\text{O}_{35}\text{P}_5\text{Pt}_2$ | 1251.200(1251.207)   |

<sup>a</sup>The most abundant isotopic mass-to-charge ratio.

<sup>b</sup>A and G represent the neutral loss of an adenine and a guanine base, respectively.

<sup>c</sup>T<sub>n</sub>, A<sub>n</sub> and G<sub>n</sub> represent the loss of a thymine, an adenine and a guanine base, respectively, followed by elimination of a H<sub>2</sub>O molecule to form a furan ring, n indicates the position of the base in strand **I**.

<sup>d</sup>The internal fragment B<sub>m</sub>:B<sub>n</sub> results from fragmentation at both the a- and w-sites, having a phosphate group at their 5'-terminus and a furan ring at the 3'-terminus.



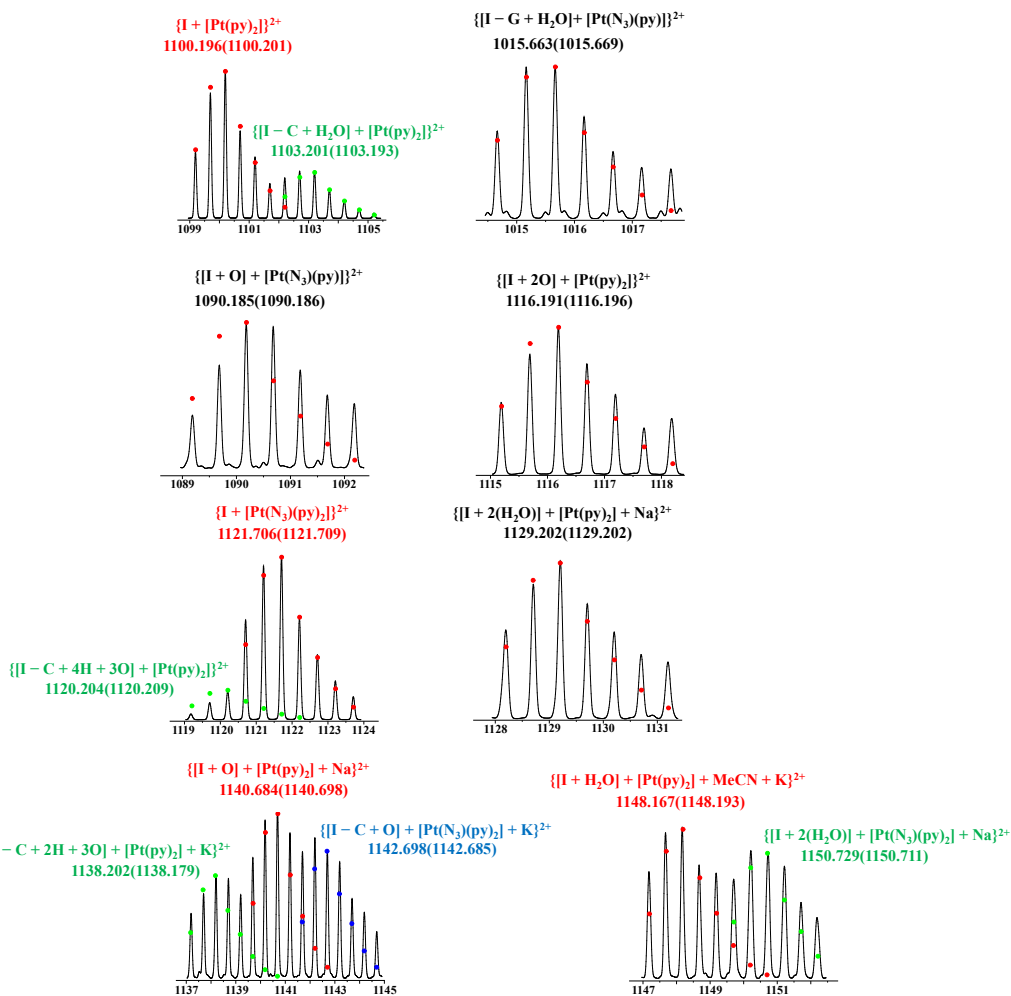

**Figure S1.** The isotopic models (dots) and mass spectra (lines) of several representative platinumated adducts under positive-ion mode for the reaction of complex **1** and ODN **I** upon light irradiation. The C, O, H, G, K and Na represent carbon atom, oxygen atom, hydrogen atom, guanine base, potassium ion and sodium ion, respectively.
